# Supplementary material
Source: PubMed Central journal article supplement (PMC2701021)
Supplement: 0904877106_0904877106SI.pdf [file 0904877106_0904877106SI.pdf]

# Supporting Information

Hubert et al. 10.1073/pnas.0904877106

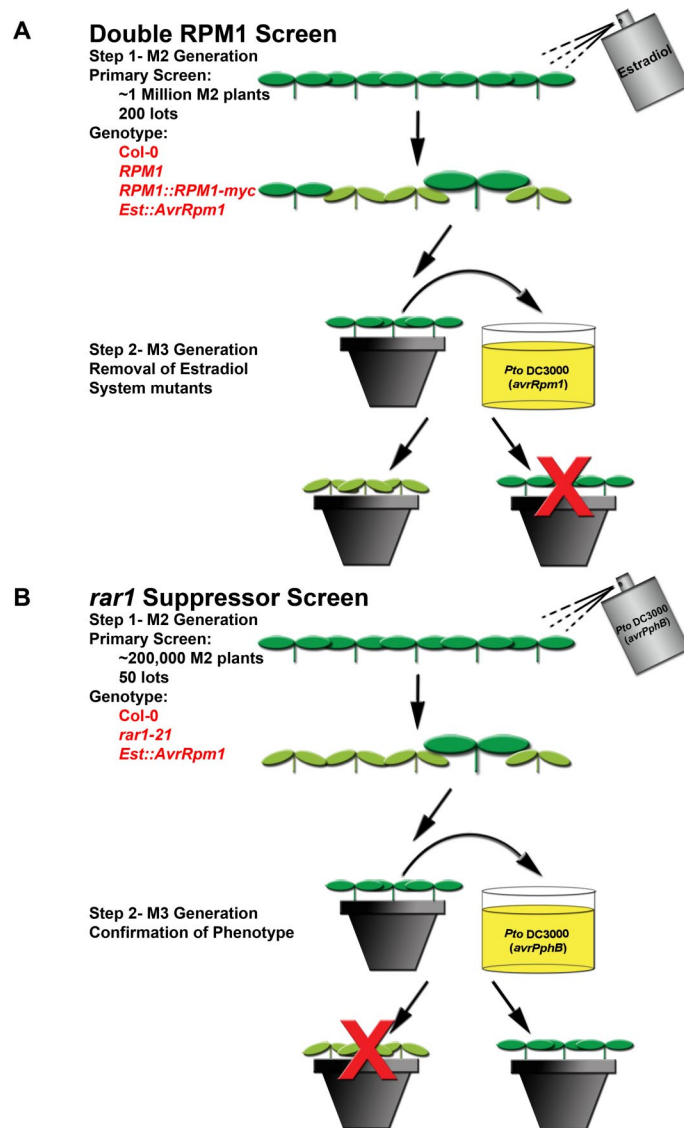

**Fig. S1.** Two genetic screens to identify genes involved in plant disease resistance. These flow charts depict the process conducted in both genetic screens. (A) The Double RPM1 Screen began with wild-type Columbia-0 plants expressing *RPM1*. An estradiol-inducible version of the bacterial gene *AvrRpm1* was introduced along with an *RPM1* transgene carrying a myc-epitope-tagged version of *RPM1* under the control of its native promoter (1, 2). This line was mutagenized, and  $\approx 100$   $M_1$  plants were allowed to self in each of 200 separate pools or lots. *AvrRpm1* expression in the resulting  $M_2$  plants was induced with estradiol. Seed was collected from nonresponsive plants. These  $M_3$  plants were then tested for resistance to *Pto* DC3000(*avrRpm1*). This step allowed the identification and removal of plants with mutations in the estradiol-inducible expression system. (B) The *rar1* suppressor screen was begun by mutagenizing *rar1-21* mutant seed (2) carrying the same estradiol-inducible version of *AvrRpm1* as in A. The resulting  $M_1$  plants were allowed to self in 50 separate lots.  $M_2$  plants were sprayed with *Pto* DC3000(*avrPphB*). Disease-resistant plants were allowed to self, and resulting  $M_3$  plants were retested by dip inoculation in separately in both *Pto* DC3000(*avrPphB*) and (*avrRpm1*) to confirm the disease-resistant phenotype.

1. Boyes DC, Nam J, Dangl JL (1998) The *Arabidopsis thaliana* *RPM1* disease resistance gene product is a peripheral plasma membrane protein that is degraded coincident with the hypersensitive response. *Proc Natl Acad Sci USA* 95:15849–15854.

2. Tornero P, et al. (2002) *RAR1* and *NDR1* contribute quantitatively to disease resistance in *Arabidopsis* and their relative contributions are dependent on the *R* gene assayed. *Plant Cell* 14:1005–1015.

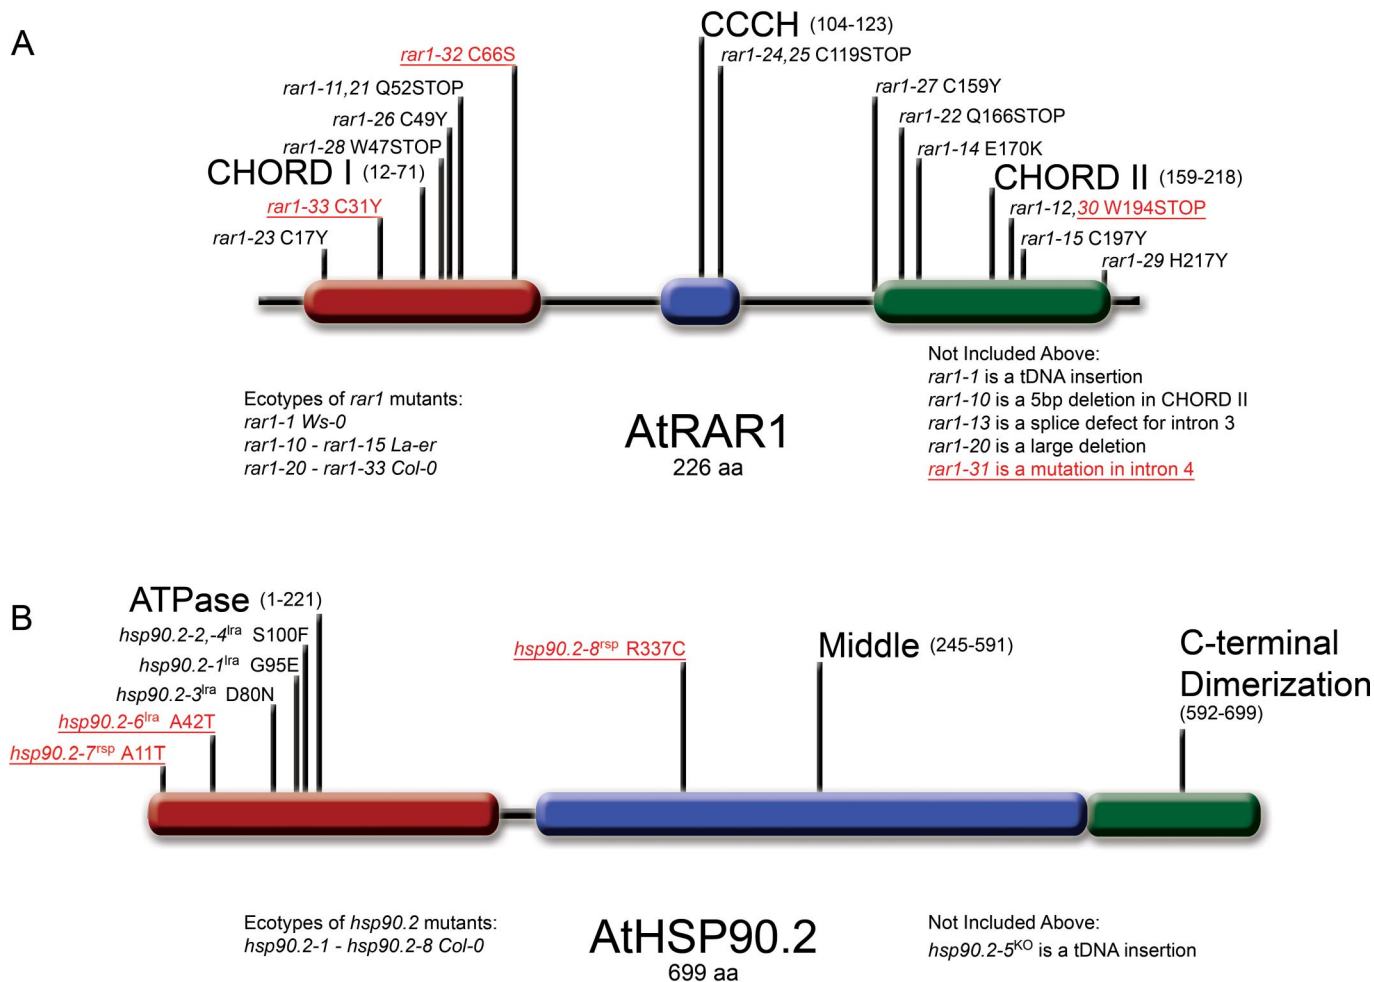

**Fig. S2.** Schematic representations of *Arabidopsis* RAR1 and HSP90.2 showing the location of all known mutant alleles. Alleles introduced in this article are underlined and in red. (A) Identified mutations in RAR1. The CHORD-I domain is shown in red, the CCCH region is shown in blue, and the CHORD-II domain is shown in green. The allele designation and associated amino acid change are shown in relation to its linear position. The ecotypes in which the mutants were identified are shown below. Noncoding mutations are described below the linear molecule. (B) Identified mutations in HSP90.2. The ATPase domain is shown in red, the middle domain is shown in blue, and the C-terminal dimerization domain is shown in green. The phenotype of the respective mutation is indicated after the allele designation and associated amino acid change, *lra* for loss of recognition of *avrRpm1* and *rsp* for *rar1* suppressor.

A

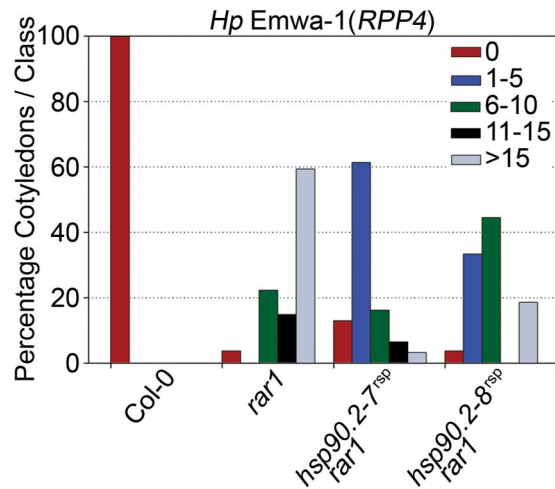

B

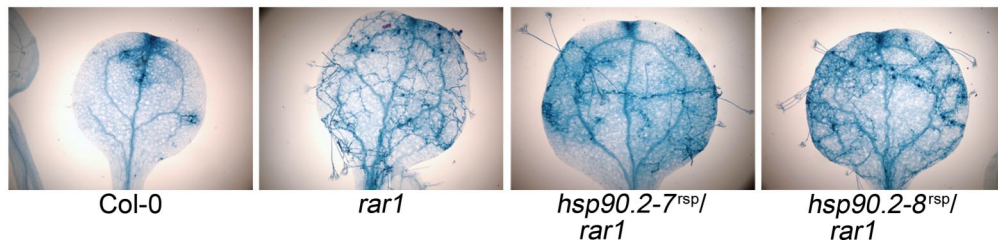

**Fig. S3.** *hsp90.2<sup>rsp</sup>* alleles suppress the *rar1* effect on *RPP4*, a TIR-NB-LRR, in response to an oomycete pathogen, *Hpa*, isolate Emwa1. (A) The *RAR1*-dependent TIR-NB-LRR protein *RPP4* conditions recognition of the *Hpa* isolate Emwa-1 in wild-type Col-0 plants. Consequently, there is no oomycete sporulation in these plants. *RAR1* is required for *RPP4*-mediated recognition. Consequently, *rar1* mutants display a high level of *Hpa* reproduction. *hsp90.2<sup>rsp</sup> rar1* double mutants both display more sporangiophores than wild-type plants but less than a *rar1* single mutant, suggesting partial suppression of *rar1* for *RPP4* function. Colored bars refer to the number of sporangiophores counted per cotyledon. Minimum of 20 cotyledons per genotype was used. (B) Trypan blue staining of dead plant cells and oomycete hyphal structures is shown. Dead xylem cells in the vascular bundle can be seen in all genotypes. While areas of death representing a HR can be seen in Col-0, fine hair-like hyphae can be seen in, and reproductive sporangiophores are shown radiating from, the *rar1* cotyledon. The *hsp90.2<sup>rsp</sup> rar1* double mutants support intermediate levels of *Hpa* growth and the trailing necrosis associated with partial NB-LRR function.



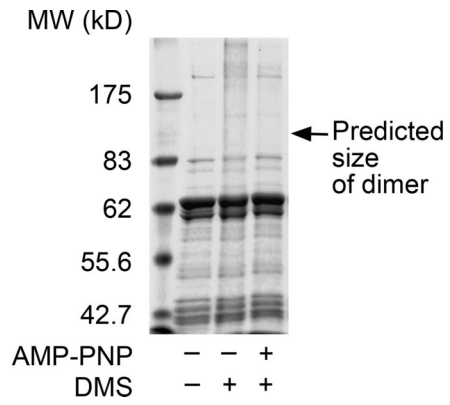

**Fig. S5.** The AtHSP90.2 ATPase domain is insufficient for dimer formation. A C-terminal truncation of HSP90 is unable to dimerize in a chemical cross-linking experiment. The protein was tested without nucleotide or with 10 mM of the nonhydrolysable ATP analog, AMP-PNP. The experiment shown was conducted at 0.25 mg/mL of HSP90  $\Delta$ C and 15 molar equivalents of DMS; similar results were obtained with 30 molar equivalents and the cross-linkers DSS and DMP.



Table S1. Previously-identified HSP90 mutations

| Mutation position in reference to AtHSP90.2 | Mutation position in reference to ScHSP90 | Mutation position in original organism | Species                         | Mutant name         | Protein        | Phenotype                                                                                                                                                                                                                             | Source/ref.    |
|---------------------------------------------|-------------------------------------------|----------------------------------------|---------------------------------|---------------------|----------------|---------------------------------------------------------------------------------------------------------------------------------------------------------------------------------------------------------------------------------------|----------------|
| <b>Single amino acid changes</b>            |                                           |                                        |                                 |                     |                |                                                                                                                                                                                                                                       |                |
| E5R                                         | E4R                                       | E6R                                    | <i>Triticum aestivum</i>        |                     | TaHSP90        | Reduced binding to the CS domain of SGT1 and AtRAR1                                                                                                                                                                                   | 1              |
| A11T                                        | A10T                                      | A11T                                   | <i>Arabidopsis thaliana</i>     | <i>Athsp90.2-7</i>  | AtHSP90.2      | Restoration of NB-LRR function and accumulation in a rar1 mutant; normal ATPase activity; normal dimerization; normal RAR1 interaction; decreased SGT1 interaction                                                                    | This study     |
| T23I                                        | T22I                                      | T22I                                   | <i>Saccharomyces cerevisiae</i> |                     | ScHSP82        | Impairs Ahr signaling; temperature sensitivity; reduced GR activity; osmosensitive; increased ATPase activity; reduced interaction with cdc37; reduced accumulation of GR; enhanced AMP-PNP binding; enhanced N-terminal dimerization | 2-7            |
| T23I                                        | T22I                                      | T22I                                   | <i>Saccharomyces cerevisiae</i> |                     | ScHSC82        | Temperature sensitive growth defect; reduced GR and v-Src activities; enhanced ATPase activity; reduced GR accumulation; reduced interactions with client protein Sti1 and Sba1                                                       | 8              |
| T23F                                        | T22F                                      | T22F                                   | <i>Saccharomyces cerevisiae</i> |                     | ScHSC82        | Increases ATP hydrolysis                                                                                                                                                                                                              | 9              |
| F24A                                        | V23A                                      | V23A                                   | <i>Saccharomyces cerevisiae</i> |                     | ScHSC82        | 4.8-fold reduction of ATP hydrolysis (compared with WT)                                                                                                                                                                               | 9              |
| Y25A                                        | Y24A                                      | Y24A                                   | <i>Saccharomyces cerevisiae</i> |                     | ScHSC82        | 4.8-fold reduction of ATP hydrolysis                                                                                                                                                                                                  | 9              |
| E292K                                       | E301K                                     | E292K                                  | <i>Caenorhabditis elegans</i>   | <i>daf-21(p673)</i> | CeHSP90        | Defects in specific chemosensory responses; reduced fertility                                                                                                                                                                         | 10             |
| E34A                                        | E33A                                      | E33A                                   | <i>Saccharomyces cerevisiae</i> |                     | ScHSP82        | Decreased ATP hydrolysis                                                                                                                                                                                                              | 11, 12         |
| E34A                                        | E33A                                      | E33A                                   | <i>Saccharomyces cerevisiae</i> |                     | ScHSC82        | Abolishes ATP hydrolysis                                                                                                                                                                                                              | 9              |
| E34A                                        | E33A                                      | E46A                                   | <i>Gallus gallus</i>            |                     | HSP90 $\alpha$ | Loses the ability to assist HSP70, HSP40 and HOP in the refolding protein; abolishes ATP hydrolysis                                                                                                                                   | 13             |
| S36L                                        | S37L                                      | S38L                                   | <i>Drosophila melanogaster</i>  | <i>E(sev)3A e1D</i> | HSP83          | Lethality; reduced Raf kinase activity; reduced binding to Raf                                                                                                                                                                        | 14, 15         |
| N38A                                        | N37A                                      | N50A                                   | <i>Gallus gallus</i>            |                     | HSP90 $\alpha$ | Abolishes nucleotide binding and interacting with p23                                                                                                                                                                                 | 13             |
| A42V                                        | A41V                                      | A41V                                   | <i>Saccharomyces cerevisiae</i> |                     | ScHSP82        | Impairs Ahr signaling; temperature sensitivity; reduced GR activity; reduced accumulation of GR; enhanced AMP-PNP binding; reduced ATPase activity                                                                                    | 3, 4, 6        |
| A42T                                        | A41T                                      | A42T                                   | <i>Arabidopsis thaliana</i>     | <i>Athsp90.2-6</i>  | AtHSP90.2      | Loss of RPM1 function and accumulation; fully penetrant phenotype; loss of ATPase activity; loss of dimerization; loss of RAR1 interaction; loss of SGT1 interaction                                                                  | This study     |
| R47C                                        | R46C                                      | R48C                                   | <i>Drosophila melanogaster</i>  | <i>13F3</i>         | HSP83          | Reduced Raf kinase activity                                                                                                                                                                                                           | 15             |
| D80N                                        | D79N                                      | D79N                                   | <i>Saccharomyces cerevisiae</i> |                     | ScHSP82        | Growth retardation; decreased binding to ATP, ADP and p23                                                                                                                                                                             | 11, 12         |
| D80N                                        | D79N                                      | D79N                                   | <i>Saccharomyces cerevisiae</i> |                     | ScHSC82        | Reduced interactions with client protein Sba1 and Cpr6                                                                                                                                                                                | 8              |
| D80N                                        | D79N                                      | D92A                                   | <i>Gallus gallus</i>            |                     | HSP90 $\alpha$ | Abolishes nucleotide binding and interacting with p23                                                                                                                                                                                 | 13             |
| D80N                                        | D79N                                      | D80N                                   | <i>Arabidopsis thaliana</i>     | <i>Athsp90.2-3</i>  | AtHSP90.2      | Loss of RPM1 function and accumulation; fully penetrant phenotype; loss of ATPase activity; loss of dimerization; loss of RAR1 interaction; loss of SGT1 interaction                                                                  | 16; this study |
| G82S                                        | G81S                                      | G81S                                   | <i>Saccharomyces cerevisiae</i> |                     | ScHSP82        | Impairs Ahr signaling; temperature sensitivity; reduced GR activity; osmosensitive                                                                                                                                                    | 3, 4, 7        |



| Mutation position in reference to AtHSP90.2 | Mutation position in reference to ScHSP90 | Mutation position in original organism | Species                          | Mutant name        | Protein         | Phenotype                                                                                                                                                                                                                                                                                                                                                                                                                                                                           | Source/ref.                |
|---------------------------------------------|-------------------------------------------|----------------------------------------|----------------------------------|--------------------|-----------------|-------------------------------------------------------------------------------------------------------------------------------------------------------------------------------------------------------------------------------------------------------------------------------------------------------------------------------------------------------------------------------------------------------------------------------------------------------------------------------------|----------------------------|
| D144R                                       | D143R                                     | D143R                                  | <i>Saccharomyces cerevisiae</i>  |                    | ScHSP82         | Reduced binding to the CS domain of SGT1                                                                                                                                                                                                                                                                                                                                                                                                                                            | 1                          |
| D144R                                       | D143R                                     | D145R                                  | <i>Triticum aestivum</i>         |                    | TaHSP90         | Reduced binding to the CS domain of SGT1 and AtRAR1                                                                                                                                                                                                                                                                                                                                                                                                                                 | 1                          |
| E145R                                       | E144R                                     | E146R                                  | <i>Triticum aestivum</i>         |                    | TaHSP90         | Reduced binding to the CS domain of SGT1                                                                                                                                                                                                                                                                                                                                                                                                                                            | 1                          |
| G155D                                       | G154D                                     | G155D                                  | <i>Schizosaccharomyces pombe</i> | <i>swa1-w1</i>     | SpHSP90         | Sensitive to stressful growth conditions; mitotic defects                                                                                                                                                                                                                                                                                                                                                                                                                           | 17, 18                     |
| G171D                                       | G170D                                     | G170D                                  | <i>Saccharomyces cerevisiae</i>  |                    | ScHSP82         | Temperature sensitivity; abolishes the activity of protein kinase Gcn2; increases HSF-dependent gene expression; abolishes the high affinity ligand binding conformation of human androgen receptor (AR); reduced levels of hormone binding by the ER; decreased activity of p60 <sup>V-src</sup> ; reduced GR activity at high temperature; declines in telomere length; loses p23 binding and ATPase activity; abolishes the accumulation of Gcn2; reduced telomerase DNA binding | 3, 4, 6, 20, 21, 27, 30–33 |
| K265A                                       | K274A                                     | K294A                                  | <i>Homo sapiens</i>              |                    | hHSP90 $\alpha$ | Mimic acetylated; reduced binding to cochaperon p23 and client protein ErbB2                                                                                                                                                                                                                                                                                                                                                                                                        | 34                         |
| K265Q                                       | K274Q                                     | K294Q                                  | <i>Homo sapiens</i>              |                    | hHSP90 $\alpha$ | Mimic acetylated; reduced binding to Cochaperone p23 and client protein ErbB2                                                                                                                                                                                                                                                                                                                                                                                                       | 34                         |
| K265R                                       | K274R                                     | K294R                                  | <i>Homo sapiens</i>              |                    | hHSP90 $\alpha$ | Unacetylated                                                                                                                                                                                                                                                                                                                                                                                                                                                                        | 34                         |
| W268G                                       | W277G                                     | W297G                                  | <i>Homo sapiens</i>              |                    | hHSP90 $\alpha$ | Blocks self-oligomerization                                                                                                                                                                                                                                                                                                                                                                                                                                                         | 35                         |
| W291A                                       | W300A                                     | W296A                                  | <i>Saccharomyces cerevisiae</i>  |                    | ScHSC82         | Reduced interaction with Sti1                                                                                                                                                                                                                                                                                                                                                                                                                                                       | 8                          |
| W291A                                       | W300A                                     | W300A                                  | <i>Saccharomyces cerevisiae</i>  |                    | ScHSP82         | Temperature sensitive growth defect; reduced GR activity; enhanced v-Scr activity; reduced binding to Aha1; increased v-Scr accumulation                                                                                                                                                                                                                                                                                                                                            | (2)                        |
| E303K                                       | E312K                                     | E317K                                  | <i>Drosophila melanogaster</i>   | <i>Esev)3A e6D</i> | HSP83           | Lethality; reduced Raf kinase activity; affected localization of nanos and pgc mRNA; reduced binding to Raf                                                                                                                                                                                                                                                                                                                                                                         | 14, 15, 29                 |
| G304N                                       | G313N                                     | G313N                                  | <i>Saccharomyces cerevisiae</i>  |                    | ScHSP82         | Affects all receptor types tested; temperature sensitivity; decreased growth rates; constitutive expression of transcription factor Gcn4; reduced levels of hormone binding by the ER; reduced activity of substrate Hap1; defective pheromone-signaling; decreases GR ligand binding activity; unstable aporeceptor complexes; reduced accumulation of substrate proteins Ste7 and Ste11                                                                                           | 22, 28, 32, 36, 37         |
| G304N                                       | G313N                                     | G329N                                  | <i>Gallus gallus</i>             |                    | HSP90 $\alpha$  | Affects interacting with HSP90 accessory proteins                                                                                                                                                                                                                                                                                                                                                                                                                                   | 38                         |
| G304S                                       | G313S                                     | G313S                                  | <i>Saccharomyces cerevisiae</i>  |                    | ScHSP82         | Impairs Ahr signaling; reduced activity of substrate Hap1 and GR; temperature sensitivity                                                                                                                                                                                                                                                                                                                                                                                           | 3, 4, 26                   |
| F320A                                       | F329A                                     | F325A                                  | <i>Saccharomyces cerevisiae</i>  |                    | ScHSC82         | Reduced interaction with Sti1                                                                                                                                                                                                                                                                                                                                                                                                                                                       | 8                          |
| L334P                                       | L343P                                     | L338P                                  | <i>Schizosaccharomyces pombe</i> | <i>git10-201</i>   | SpHSP90         | CAMP signaling defect; impaired glucose repression of <i>fbp1(+)</i> transcription                                                                                                                                                                                                                                                                                                                                                                                                  | 17                         |
| R337C                                       | R346C                                     | R337C                                  | <i>Arabidopsis thaliana</i>      | <i>Athsp90.2-8</i> | AtHSP90.2       | Restoration of NB-LRR function and accumulation in a <i>rar1</i> mutant; loss of ATPase activity; decreased dimerization; loss of RAR1 interaction; loss of SGT1 interaction                                                                                                                                                                                                                                                                                                        | This study                 |



| Mutation position in reference to AtHSP90.2 | Mutation position in reference to ScHSP90 | Mutation position in original organism | Species                         | Mutant name  | Protein                | Phenotype                                                                                                                                                                                                                                                                                                                             | Source/ref.       |
|---------------------------------------------|-------------------------------------------|----------------------------------------|---------------------------------|--------------|------------------------|---------------------------------------------------------------------------------------------------------------------------------------------------------------------------------------------------------------------------------------------------------------------------------------------------------------------------------------|-------------------|
| F340A                                       | F349A                                     | F345A                                  | <i>Saccharomyces cerevisiae</i> |              | ScHSC82                | Reduced interaction with Sba1 and Cpr6                                                                                                                                                                                                                                                                                                | 8                 |
| P350A                                       | P359A                                     | P379A                                  | <i>Homo sapiens</i>             |              | hHSP90 $\alpha$        | Blocks self-oligomerization                                                                                                                                                                                                                                                                                                           | 35                |
| F355A                                       | F364A                                     | F384A                                  | <i>Homo sapiens</i>             |              | hHSP90 $\alpha$        | Blocks self-oligomerization                                                                                                                                                                                                                                                                                                           | 35                |
| E363K                                       | E372K                                     | E377K                                  | <i>Drosophila melanogaster</i>  | 9J1          | HSP83                  | Reduced Raf kinase activity                                                                                                                                                                                                                                                                                                           | 15                |
| L367D                                       | L376D                                     | L372D                                  | <i>Saccharomyces cerevisiae</i> |              | ScHSC82                | 60-fold reduction of ATP hydrolysis                                                                                                                                                                                                                                                                                                   | 9                 |
| L367S                                       | L376S                                     | L392S                                  | <i>Gallus gallus</i>            |              | HSP90 $\alpha$         | Reduced binding activity to p23                                                                                                                                                                                                                                                                                                       | 39                |
| I369N                                       | L378N                                     | L374N                                  | <i>Saccharomyces cerevisiae</i> |              | ScHSC82                | 3-fold reduction of ATP hydrolysis                                                                                                                                                                                                                                                                                                    | 9                 |
| R371A                                       | R380A                                     | R376A                                  | <i>Saccharomyces cerevisiae</i> |              | ScHSC82                | Reduced interaction with Sba1; 6.7 fold reduction of ATP hydrolysis                                                                                                                                                                                                                                                                   | 8, 9              |
| E372K                                       | E381K                                     | E381K                                  | <i>Saccharomyces cerevisiae</i> |              | ScHSP82                | Impairs AhR signaling; temperature sensitivity; reduced GR activity; temperature sensitive growth defect; reduced GR and v-Scr activities; reduced GR and v-Scr accumulations                                                                                                                                                         | 2-4               |
| E372K                                       | E381K                                     | E377K                                  | <i>Saccharomyces cerevisiae</i> |              | ScHSC82                | Reduced interaction with Sti1                                                                                                                                                                                                                                                                                                         | 8                 |
| E422K                                       | E431K                                     | E431K                                  | <i>Saccharomyces cerevisiae</i> |              | ScHSP82                | Affects glucocorticoid receptor (GR) signaling; Impairs Aryl hydrocarbon receptor (AhR) signaling; reduced levels of hormone binding by the ER; temperature sensitive growth defect; reduced v-Scr activity; reduced ATPase activity; reduced GR accumulation                                                                         | 2, 3, 20, 36, 37  |
| L448A                                       | L457A                                     | L477A                                  | <i>Homo sapiens</i>             |              | hHSP90 $\alpha$        | Blocks self-oligomerization; blocks binding to HtpGA                                                                                                                                                                                                                                                                                  | 40                |
| S476K                                       | S485K                                     | S485K                                  | <i>Saccharomyces cerevisiae</i> |              | ScHSP82                | Reduced levels of hormone binding by the ER                                                                                                                                                                                                                                                                                           | 20                |
| S476Y                                       | S485Y                                     | S485Y                                  | <i>Saccharomyces cerevisiae</i> |              | ScHSP82                | Temperature-sensitive growth defect; reduced GR and v-Scr activities; reduced ATPase activity; reduced binding to p23 and Ahal; reduced v-Scr accumulation                                                                                                                                                                            | 2, 21             |
| S476Y                                       | S485Y                                     | S481Y                                  | <i>Saccharomyces cerevisiae</i> |              | ScHSC82                | Reduced interactions with Sba1 and Cpr6                                                                                                                                                                                                                                                                                               | 8                 |
| L482S                                       | L491S                                     | L487S                                  | <i>Saccharomyces cerevisiae</i> |              | ScHSC82                | Reduced interactions with Sba1 and Cpr6                                                                                                                                                                                                                                                                                               | 8                 |
| E488A                                       | E497E                                     | E517A                                  | <i>Homo sapiens</i>             |              | hHSP90 $\alpha$        | Blocks self-oligomerization; blocks binding to HtpGA                                                                                                                                                                                                                                                                                  | 40                |
| $\Delta$ Y491                               | $\Delta$ F500                             | $\Delta$ F492                          | <i>Podospora anserina</i>       | mod-E1       | Member of HSP90 family | Alters the sexual cycle and partially suppresses vegetative incompatibility                                                                                                                                                                                                                                                           | 41                |
| T516I                                       | T525I                                     | T525I                                  | <i>Saccharomyces cerevisiae</i> |              | ScHSP82                | Affects all receptor types tested; temperature sensitivity; decreased growth rates; constitutive expression of transcription factor Gcn4; decreases GR ligand binding activity; unstable aporeceptor complexes; reduced GR and v-Scr activities; reduced ATPase activity; reduced binding to p23 and Ahal; reduced v-Scr accumulation | 2, 21, 30, 36, 37 |
| T516I                                       | T525I                                     | T521I                                  | <i>Saccharomyces cerevisiae</i> |              | ScHSC82                | Reduced interactions with Sba1 and Cpr6                                                                                                                                                                                                                                                                                               | 8                 |
| T516I                                       | T525I                                     | T541I                                  | <i>Gallus gallus</i>            |              | HSP90 $\alpha$         | Affects interacting with HSP90 accessory proteins                                                                                                                                                                                                                                                                                     | 38                |
| K532Q                                       | R540Q                                     | M553Q                                  | <i>Homo sapiens</i>             |              | hHSP90 $\beta$         | Moderately enhances dimeric activity                                                                                                                                                                                                                                                                                                  | 42                |
| E537A                                       | K545A                                     | T566A                                  | <i>Homo sapiens</i>             |              | hHSP90 $\alpha$        | Decreased dimeric activity                                                                                                                                                                                                                                                                                                            | 42                |
| E537T                                       | K545T                                     | A558T                                  | <i>Homo sapiens</i>             |              | hHSP90 $\beta$         | Enhances dimeric activity                                                                                                                                                                                                                                                                                                             | 42                |
| E537V                                       | K545V                                     | A558V                                  | <i>Homo sapiens</i>             |              | hHSP90 $\beta$         | Enhances dimeric activity                                                                                                                                                                                                                                                                                                             | 42                |
| E537I                                       | K545I                                     | A558I                                  | <i>Homo sapiens</i>             |              | hHSP90 $\beta$         | Enhances dimeric activity                                                                                                                                                                                                                                                                                                             | 42                |
| E537R                                       | K545R                                     | A558R                                  | <i>Homo sapiens</i>             |              | hHSP90 $\beta$         | Enhances dimeric activity                                                                                                                                                                                                                                                                                                             | 42                |
| E537Y                                       | K545Y                                     | A558Y                                  | <i>Homo sapiens</i>             |              | hHSP90 $\beta$         | Moderately enhances dimeric activity                                                                                                                                                                                                                                                                                                  | 42                |
| S560C                                       | S568C                                     | S574C                                  | <i>Drosophila melanogaster</i>  | E(sev)3A e3A | HSP83                  | Lethality                                                                                                                                                                                                                                                                                                                             | 14                |
| D565T                                       | D537T                                     | S586T                                  | <i>Homo sapiens</i>             |              | hHSP90 $\beta$         | Moderately enhances dimeric activity                                                                                                                                                                                                                                                                                                  | 42                |
| T578F                                       | S586F                                     | S592F                                  | <i>Drosophila melanogaster</i>  | E(sev)3A e6A | HSP83                  | Lethality; affected localization of nanos and pgc mRNA                                                                                                                                                                                                                                                                                | 14, 29            |

| Mutation position in reference to AtHSP90.2    | Mutation position in reference to ScHSP90 | Mutation position in original organism | Species                          | Mutant name        | Protein         | Phenotype                                                                                                                                                                                                                      | Source/ref. |
|------------------------------------------------|-------------------------------------------|----------------------------------------|----------------------------------|--------------------|-----------------|--------------------------------------------------------------------------------------------------------------------------------------------------------------------------------------------------------------------------------|-------------|
| A579T                                          | A587T                                     | A587T                                  | <i>Saccharomyces cerevisiae</i>  |                    | ScHSP82         | Temperature sensitivity; reduced GR activity; hypersensitive to GA and RD; reduced activity of substrate Hap1                                                                                                                  | 4, 7, 26    |
| A579T                                          | A587T                                     | A583T                                  | <i>Saccharomyces cerevisiae</i>  |                    | ScHSC82         | Reduced interactions with Sba1 and Cpr6                                                                                                                                                                                        | 8           |
| S600A                                          | S608M                                     | A629M                                  | <i>Homo sapiens</i>              |                    | hHSP90 $\alpha$ | Decreased dimeric activity                                                                                                                                                                                                     | 42          |
| S600A                                          | S608A                                     | M621A                                  | <i>Homo sapiens</i>              |                    | hHSP90 $\beta$  | Enhances dimeric activity                                                                                                                                                                                                      | 42          |
| S600W                                          | S608W                                     | M621W                                  | <i>Homo sapiens</i>              |                    | hHSP90 $\beta$  | Moderately enhances dimeric activity                                                                                                                                                                                           | 42          |
| S600V                                          | S608V                                     | M621V                                  | <i>Homo sapiens</i>              |                    | hHSP90 $\beta$  | Moderately enhances dimeric activity                                                                                                                                                                                           | 42          |
| D615A                                          | K623A                                     | E644A                                  | <i>Homo sapiens</i>              |                    | hHSP90 $\alpha$ | Increased chaperon activity                                                                                                                                                                                                    | 43          |
| D622A                                          | D630A                                     | E651A                                  | <i>Homo sapiens</i>              |                    | hHSP90 $\alpha$ | Decreased chaperon activity; inhibited binding to Hop                                                                                                                                                                          | 43          |
| D624A                                          | G632A                                     | D653A                                  | <i>Homo sapiens</i>              |                    | hHSP90 $\alpha$ | Decreased chaperon activity; abolished binding to Hop                                                                                                                                                                          | 43          |
| L635I                                          | K644I                                     | V656I                                  | <i>Homo sapiens</i>              |                    | hHSP90 $\beta$  | Enhances dimeric activity                                                                                                                                                                                                      | 42          |
| E639A                                          | E648A                                     | E668A                                  | <i>Homo sapiens</i>              |                    | hHSP90 $\alpha$ | Increased chaperon activity                                                                                                                                                                                                    | 43          |
| A641F                                          | A650F                                     | S655F                                  | <i>Drosophila melanogaster</i>   | <i>E(sev3A e4A</i> | HSP83           | Lethality                                                                                                                                                                                                                      | 14          |
| L649R                                          | L658R                                     | L654R                                  | <i>Schizosaccharomyces pombe</i> | <i>swa1-21</i>     | SpHSP90         | Temperature- sensitive growth defect; impaired glucose repression of <i>fbp1(+)</i> transcription                                                                                                                              | 17          |
| F655A                                          | F664A                                     | F660A                                  | <i>Saccharomyces cerevisiae</i>  |                    | ScHSC82         | Reduced interactions with Sba1 and Cpr6                                                                                                                                                                                        | 8           |
| E685A                                          | E698A                                     | E720A                                  | <i>Homo sapiens</i>              |                    | hHSP90 $\alpha$ | Abolished binding to PP5 and FKBP52                                                                                                                                                                                            | 43          |
| D687A                                          | P700A                                     | D722A                                  | <i>Homo sapiens</i>              |                    | hHSP90 $\alpha$ | Abolished binding to PP5 and FKBP52                                                                                                                                                                                            | 43          |
| A688A                                          | A701A                                     | D723A                                  | <i>Homo sapiens</i>              |                    | hHSP90 $\alpha$ | Abolished binding to PP5 and FKBP52                                                                                                                                                                                            | 43          |
| D689A                                          | D702A                                     | D724A                                  | <i>Homo sapiens</i>              |                    | hHSP90 $\alpha$ | Abolished binding to PP5 and FKBP52                                                                                                                                                                                            | 43          |
| E696A                                          | E706A                                     | E729A                                  | <i>Homo sapiens</i>              |                    | hHSP90 $\alpha$ | Abolished binding to TPR proteins                                                                                                                                                                                              | 43          |
| E697A                                          | E707A                                     | E730A                                  | <i>Homo sapiens</i>              |                    | hHSP90 $\alpha$ | Abolished binding to TPR proteins                                                                                                                                                                                              | 43          |
| D699A                                          | D709A                                     | D732A                                  | <i>Homo sapiens</i>              |                    | hHSP90 $\alpha$ | Abolished binding to TPR proteins                                                                                                                                                                                              | 43          |
| <b>Changes involving 2 or more amino acids</b> |                                           |                                        |                                  |                    |                 |                                                                                                                                                                                                                                |             |
| T23F/R371A                                     | T22F/R380A                                | T22F/R376A                             | <i>Saccharomyces cerevisiae</i>  |                    | ScHSC82         | 1.6-fold reduction of ATP hydrolysis                                                                                                                                                                                           | 9           |
| F24A/R371A                                     | V23A/R380A                                | V23A/R376A                             | <i>Saccharomyces cerevisiae</i>  |                    | ScHSC82         | 20-fold reduction of ATP hydrolysis                                                                                                                                                                                            | 9           |
| Y25A/R371A                                     | Y24A/R380A                                | Y24A/R376A                             | <i>Saccharomyces cerevisiae</i>  |                    | ScHSC82         | 24-fold reduction of ATP hydrolysis                                                                                                                                                                                            | 9           |
| S219A/E239A                                    | P218A/E249A                               | S226A/S255A                            | <i>Homo sapiens</i>              |                    | hHSP90 $\beta$  | Increased transcription activity of AhR gene; phosphorylation defect; enhanced interaction with AhR; reduces the resistance of mouse cell to cytochrome c; inhibits phosphorylation; enhances binding to client protein Apaf-1 | 44, 45      |
| F320A/L322A/F323A                              | F329A/L331A/F332A                         | F329A/L331A/F332A                      | <i>Saccharomyces cerevisiae</i>  |                    | ScHSP82         | Reduced GR and v-Src activities                                                                                                                                                                                                | 2           |
| R337A/R338A                                    | R346A/R347A                               | R362A/R363A                            | <i>Gallus gallus</i>             |                    | HSP90 $\alpha$  | Abolishes binding to p23                                                                                                                                                                                                       | 39          |
| L369N/R371A                                    | L378N/R380A                               | L374N/R376A                            | <i>Saccharomyces cerevisiae</i>  |                    | ScHSC82         | 24-fold reduction of ATP hydrolysis                                                                                                                                                                                            | 9           |
| A568T/V571K                                    | A576T/R579K                               | A576T/R579K                            | <i>Saccharomyces cerevisiae</i>  |                    | ScHSP82         | Affects all receptor types tested; temperature sensitivity; decreased growth rates; decreases GR ligand binding activity; unstable aporeceptor complexes                                                                       | 36, 37      |
| I584A/M585A                                    | I592A/M593A                               | I588A/M589A                            | <i>Saccharomyces cerevisiae</i>  |                    | ScHSC82         | Reduced interactions with Sba1 and Cpr6                                                                                                                                                                                        | 8           |
| L636S/L637S                                    | L645S/L646S                               | L665S/L666S                            | <i>Homo sapiens</i>              |                    | hHSP90 $\alpha$ | Blocks self-oligomerization and binding to client protein                                                                                                                                                                      | 46          |
| L642S/L643S                                    | L651S/L652S                               | L647S/L648S                            | <i>Saccharomyces cerevisiae</i>  |                    | ScHSC82         | Reduced interactions with Sba1 and Cpr6                                                                                                                                                                                        | 8           |
| L642S/L643S                                    | L651S/L652S                               | L671S/L672S                            | <i>Homo sapiens</i>              |                    | hHSP90 $\alpha$ | Blocks self-oligomerization and binding to client protein                                                                                                                                                                      | 46          |
| E696A/E697A                                    | E706A/E707A                               | E725A/E726A                            | <i>Gallus gallus</i>             |                    | HSP90 $\alpha$  | Affects interacting with HSP90 accessory proteins                                                                                                                                                                              | 38          |

Neither the *rsp* phenotype nor the *rsp* allele mutations have been previously observed. This is a comprehensive list of previously-identified HSP90 mutations identified from all organisms in relation to HSP90.2 amino acid sequence. Mutations are given in relation to AtHSP90.2 and ScHSP82 sequence and the sequence of the originally-identified mutation. Genetic and biochemical characterization of each mutation is also given. Truncations and large deletions have been omitted.

1. Boyes DC, Nam J, Dangl JL (1998) The *Arabidopsis thaliana* RPM1 disease resistance gene product is a peripheral plasma membrane protein that is degraded coincident with the hypersensitive response. *Proc Natl Acad Sci USA* 95:15849–15854.
2. Tornero P, et al. (2002) *RAR1* and *NDR1* contribute quantitatively to disease resistance in *Arabidopsis* and their relative contributions are dependent on the *R* gene assayed. *Plant Cell* 14:1005–1015.
3. Kadota Y, et al. (2008) Structural and functional analysis of SGT1-HSP90 core complex required for innate immunity in plants. *EMBO Rep* 9:1209–1215.
4. Hawle P, et al. (2006) The middle domain of Hsp90 acts as a discriminator between different types of client proteins. *Mol Cell Biol* 26:8385–8395.
5. Cox MB, Miller CA, 3rd (2004) Cooperation of heat shock protein 90 and p23 in aryl hydrocarbon receptor signaling. *Cell Stress Chaperones* 9:4–20.
6. Nathan DF, Lindquist S (1995) Mutational analysis of Hsp90 function: Interactions with a steroid receptor and a protein kinase. *Mol Cell Biol* 15:3917–3925.
7. Millson SH, et al. (2004) Investigating the protein–protein interactions of the yeast Hsp90 chaperone system by two-hybrid analysis: Potential uses and limitations of this approach. *Cell Stress Chaperones* 9:359–68.
8. Prodromou C, et al. (2000) The ATPase cycle of Hsp90 drives a molecular ‘clamp’ via transient dimerization of the N-terminal domains. *EMBO J* 19:4383–4392.
9. Peter W, et al. (2003) Sensitivity to Hsp90-targeting drugs can arise with mutation to the Hsp90 chaperone, cochaperones and plasma membrane ATP binding cassette transporters of yeast. *Eur J Biochem* 270:4689–4695.
10. Johnson JL, Halas A, Flom G (2007) Nucleotide-dependent interaction of *Saccharomyces cerevisiae* Hsp90 with the cochaperone proteins Sti1, Cpr6, and Sba1. *Mol Cell Biol* 27:768–776.
11. Cunningham CN, Krukenberg KA, Agard DA (2008) Intra- and intermonomer interactions are required to synergistically facilitate ATP hydrolysis in Hsp90. *J Biol Chem* 283:21170–21178.
12. Birnby DA, et al. (2000) A transmembrane guanylyl cyclase (DAF-11) and Hsp90 (DAF-21) regulate a common set of chemosensory behaviors in *Caenorhabditis elegans*. *Genetics* 155:85–104.
13. Obermann WMJ, Sondermann H, Russo AA, Pavletich NP, Hartl FU (1998) In vivo function of Hsp90 is dependent on ATP binding and ATP hydrolysis. *J Cell Biol* 143:901–910.
14. Panaretou B, et al. (1998) ATP binding and hydrolysis are essential to the function of the Hsp90 molecular chaperone in vivo. *EMBO J* 17:4829–4836.
15. Grenert JP, Johnson BD, Toft DO (1999) The importance of ATP binding and hydrolysis by Hsp90 in formation and function of protein heterocomplexes. *J Biol Chem* 274:17525–17533.
16. Cutforth T, Rubin GM (1994) Mutations in Hsp83 and cdc37 impair signaling by the sevenless receptor tyrosine kinase in *Drosophila*. *Cell* 77:1027–1036.
17. van der Straten A, Rommel C, Dickson B, Hafen E (1997) The heat shock protein 83 (Hsp83) is required for Raf-mediated signalling in *Drosophila*. *EMBO J* 16:1961–1969.
18. Hubert DA, et al. (2003) Cytosolic HSP90 associates with and modulates the *Arabidopsis* RPM1 disease resistance protein. *EMBO J* 22:5679–5689.
19. Alaamery MA, Hoffman CS (2008) *Schizosaccharomyces pombe* Hsp90/Git10 is required for glucose/cAMP signaling. *Genetics* 178:1927–1936.
20. Alligue R, Akhavan-Niak H, Russell P (1994) A role for Hsp90 in cell cycle control: Wee1 tyrosine kinase activity requires interaction with Hsp90. *EMBO J* 13:6099–6106.
21. Zhang M, et al. (2008) Structural and functional coupling of Hsp90- and Sgt1-centred multiprotein complexes. *EMBO J* 27:2789–2798.
22. Fliss AE, Benzeno S, Rao J, Caplan AJ (2000) Control of estrogen receptor ligand binding by Hsp90. *J Steroid Biochem Mol Biol* 72:223–230.
23. Kimura Y, Matsumoto S, Yahara I (1994) Temperature-sensitive mutants of hsp82 of the budding yeast *Saccharomyces cerevisiae*. *Mol Gen Genet* 242:517–527.
24. Onouha SC, et al. (2007) Mechanistic studies on Hsp90 inhibition by ansamycin derivatives. *J Mol Biol* 372:287–297.
25. Lee Y-S, Marcu MG, Neckers L (2004) Quantum chemical calculations and mutational analysis suggest heat shock protein 90 catalyzes *trans-cis* isomerization of geldanamycin. *Chem Biol* 11:991–998.
26. Marcu MG, Chadli A, Bouhouche I, Catelli M, Neckers LM (2000) The heat shock protein 90 antagonist novobiocin interacts with a previously unrecognized ATP-binding domain in the carboxyl terminus of the chaperone. *J Biol Chem* 275:37181–37186.
27. Bali M, Zhang B, Morano KA, Michels CA (2003) The Hsp90 molecular chaperone complex regulates maltose induction and stability of the *Saccharomyces* MAL gene transcription activator Mal63p. *J Biol Chem* 278:47441–47448.
28. Lee HC, Hon T, Zhang L (2002) The molecular chaperone Hsp90 mediates heme activation of the yeast transcriptional activator Hap1. *J Biol Chem* 277:7430–7437.
29. Toogun OA, DeZwaan DC, Freeman BC (2008) The Hsp90 molecular chaperone modulates multiple telomerase activities. *Mol Cell Biol* 28:457–467.
30. Stemmann O, Neidig A, Kocher T, Wilm M, Lechner J (2002) Hsp90 enables Ctf13p/Skp1p to nucleate the budding yeast kinetochore. *Proc Natl Acad Sci USA* 99:8585–8590.
31. Song Y, Fee L, Lee TH, Wharton RP (2007) The molecular chaperone Hsp90 is required for mRNA localization in *Drosophila melanogaster* embryos. *Genetics* 176:2213–2222.
32. Donze O, Picard D (1999) Hsp90 binds and regulates the ligand-inducible  $\alpha$ -subunit of eukaryotic translation initiation factor kinase Gcn2. *Mol Cell Biol* 19:8422–8432.
33. Duina AA, Kalton HM, Gaber RF (1998) Requirement for Hsp90 and a Cyp-40-type cyclophilin in negative regulation of the heat shock response. *J Biol Chem* 273:18974–18978.
34. Fang Y, Fliss AE, Robins DM, Caplan AJ (1996) Hsp90 regulates androgen receptor hormone binding affinity in vivo. *J Biol Chem* 271:28697–28702.
35. Nathan DF, Vos MH, Lindquist S (1997) In vivo functions of the *Saccharomyces cerevisiae* Hsp90 chaperone. *Proc Natl Acad Sci USA* 94:12949–12956.
36. Scroggins BT, et al. (2007) An acetylation site in the middle domain of Hsp90 regulates chaperone function. *Mol Cell* 25:151–159.
37. Nemoto TK, et al. (2004) The region adjacent to the highly immunogenic site and shielded by the middle domain is responsible for self-oligomerization/client binding of the HSP90 molecular chaperone. *Biochemistry* 43:7628–7636.
38. Bohlen SP (1995) Hsp90 mutants disrupt glucocorticoid receptor ligand binding and destabilize aporeceptor complexes. *J Biol Chem* 270:29433–29438.
39. Bohlen SP, Yamamoto KR (1993) Isolation of Hsp90 mutants by screening for decreased steroid receptor function. *Proc Natl Acad Sci USA* 90:11424–11428.
40. Chen S, Sullivan WP, Toft DO, Smith DF (1998) Differential interactions of p23 and the TPR-containing proteins Hop, Cyp40, FKBP52, and FKBP51 with Hsp90 mutants. *Cell Stress Chaperones* 3:118–129.
41. Chadli A, et al. (2000) Dimerization and N-terminal domain proximity underlie the function of the molecular chaperone heat shock protein 90. *Proc Natl Acad Sci USA* 97:12524–12529.
42. Matsumoto S, et al. (2002) Interaction between the N-terminal and middle regions is essential for the in vivo function of HSP90 molecular chaperone. *J Biol Chem* 277:34959–34966.
43. Loubradou G, Begueret J, Turcq B (1997) A mutation in an HSP90 gene affects the sexual cycle and suppresses vegetative incompatibility in the fungus *Podospira anserina*. *Genetics* 147:581–588.
44. Kobayakawa T, Yamada S, Mizuno A, Nemoto TK (2008) Substitution of only two residues of human Hsp90 $\alpha$  causes impeded dimerization of Hsp90 $\beta$ . *Cell Stress Chaperones* 13:97–104.
45. Ramsey AJ, Russell LC, Whitt SR, Chinkers M (2000) Overlapping sites of tetratricopeptide repeat protein binding and chaperone activity in heat shock protein 90. *J Biol Chem* 275:17857–17862.
46. Ogiso H, et al. (2004) Phosphorylation analysis of 90-kDa heat shock protein within the cytosolic arylhydrocarbon receptor complex. *Biochemistry* 43:15510–15519.
47. Kurokawa M, Zhao C, Reya T, Kornbluth S (2008) Inhibition of apoptosome formation by suppression of Hsp90 $\beta$  phosphorylation in tyrosine kinase-induced leukemias. *Mol Cell Biol* 28:5494–506.
48. Yamada S, et al. (2003) A hydrophobic segment within the C-terminal domain is essential for both client-binding and dimer formation of the HSP90-family molecular chaperone. *Eur J Biochem* 270:146–154.
